# Supplementary material for: In Situ Growth and UV Photocatalytic Effect of ZnO Nanostructures on a Zn Plate Immersed in Methylene Blue
Source: MDPI journal article supplement (doi:10.3390/catal12121657), 2022-12-16
Supplement: s1 [file s1]

# In Situ Growth and UV Photocatalytic Effect of ZnO Nanostructures on a Zn Plate immersed in Methylene Blue

Ranjitha K. Hariharalakshmanan <sup>1,\*</sup>, Fumiya Watanabe <sup>2</sup> and Tansel Karabacak <sup>1</sup>

<sup>1</sup> School of Physical Sciences, University of Arkansas at Little Rock, Little Rock, AR 72204, USA; txkarabacak@ualr.edu

<sup>2</sup> Center for Integrative Nanotechnology Sciences, University of Arkansas at Little Rock, Little Rock, AR 72204, USA; fxwatanabe@ualr.edu

\* Correspondence: rhariharalak@ualr.edu

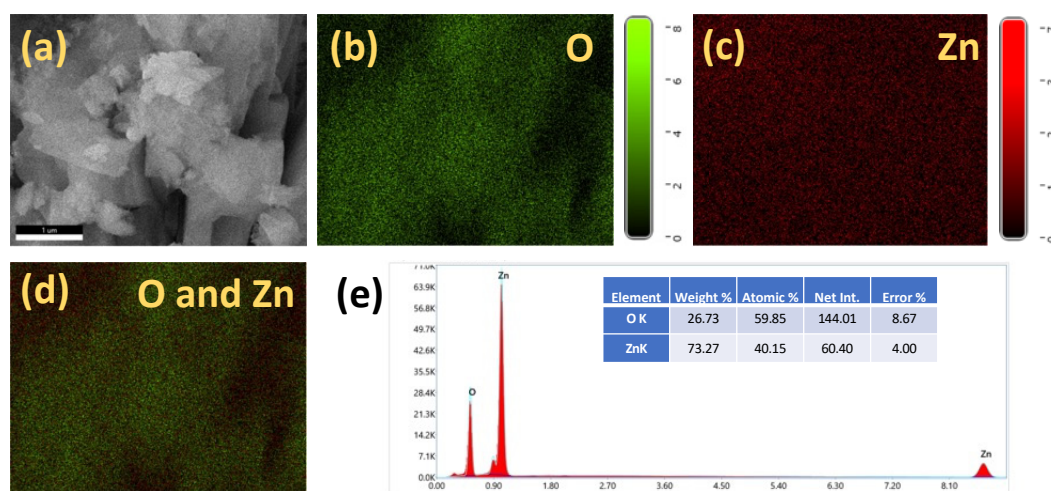

**Figure S1.** (a) SEM image and (b–d) corresponding EDS maps of irregularly shaped ZnO nanostructures grown on Zn surface in MB and with UV light, and (e) elemental composition of the same.

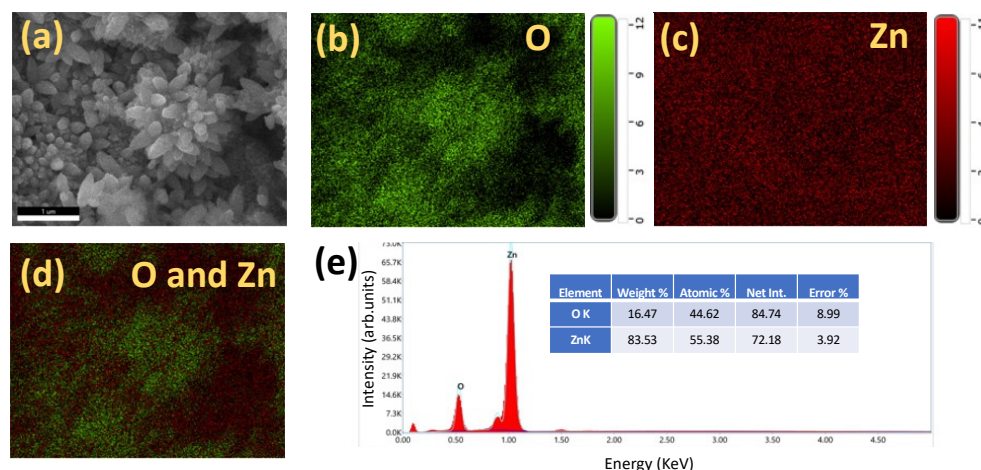

**Figure S2.** (a) SEM image and (b–d) corresponding EDS maps of ZnO nanostructures grown on Zn surface in MB and without UV light, and (e) elemental composition of the same.

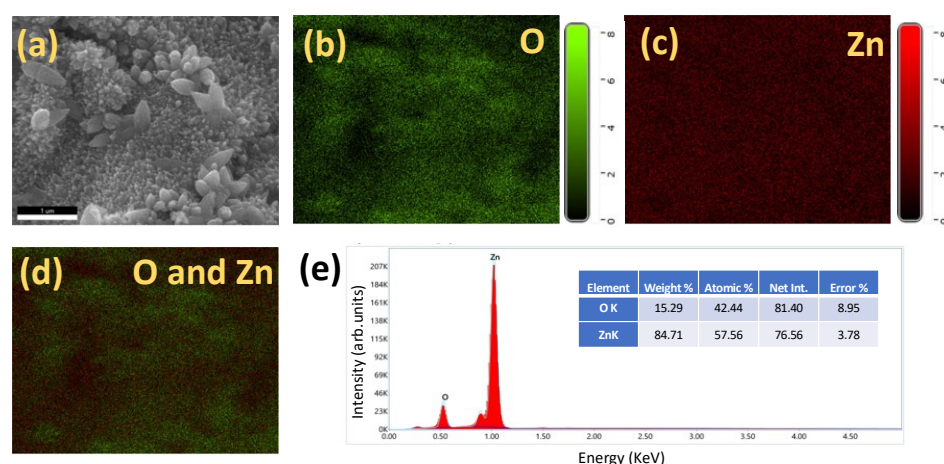

**Figure S3.** (a) SEM image and (b–d) corresponding EDS maps of ZnO nanostructures grown on Zn surface in DI water and with UV light, and (e) elemental composition of the same.

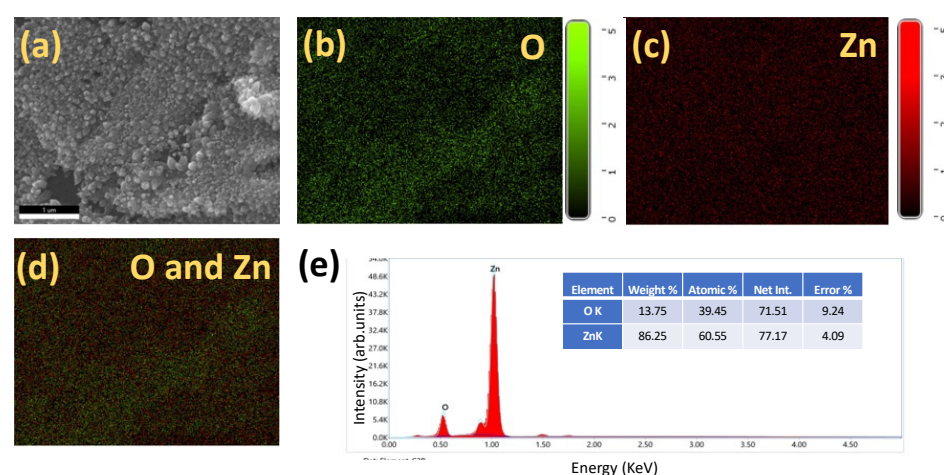

**Figure S4.** (a) SEM image and (b–d) corresponding EDS maps of ZnO nanostructures grown on Zn surface in DI water and without UV light, and (e) elemental composition of the same.

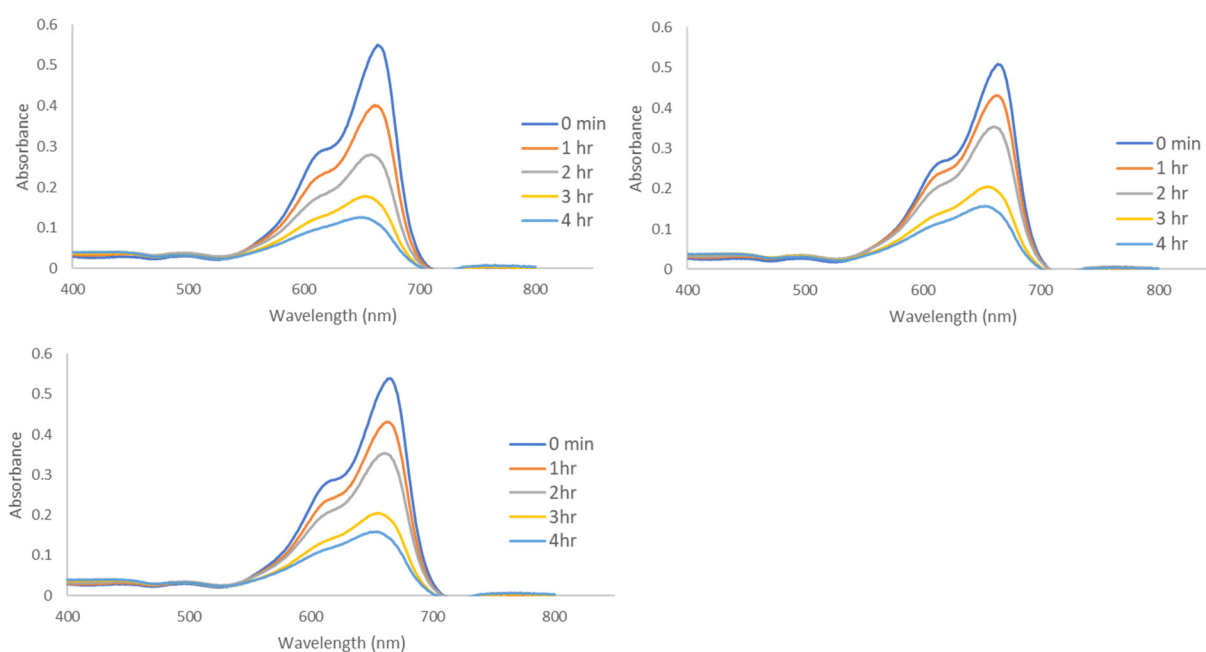

**Figure S5.** Time dependent UV-Vis spectra of MB with ZnO nanostructures and UV light.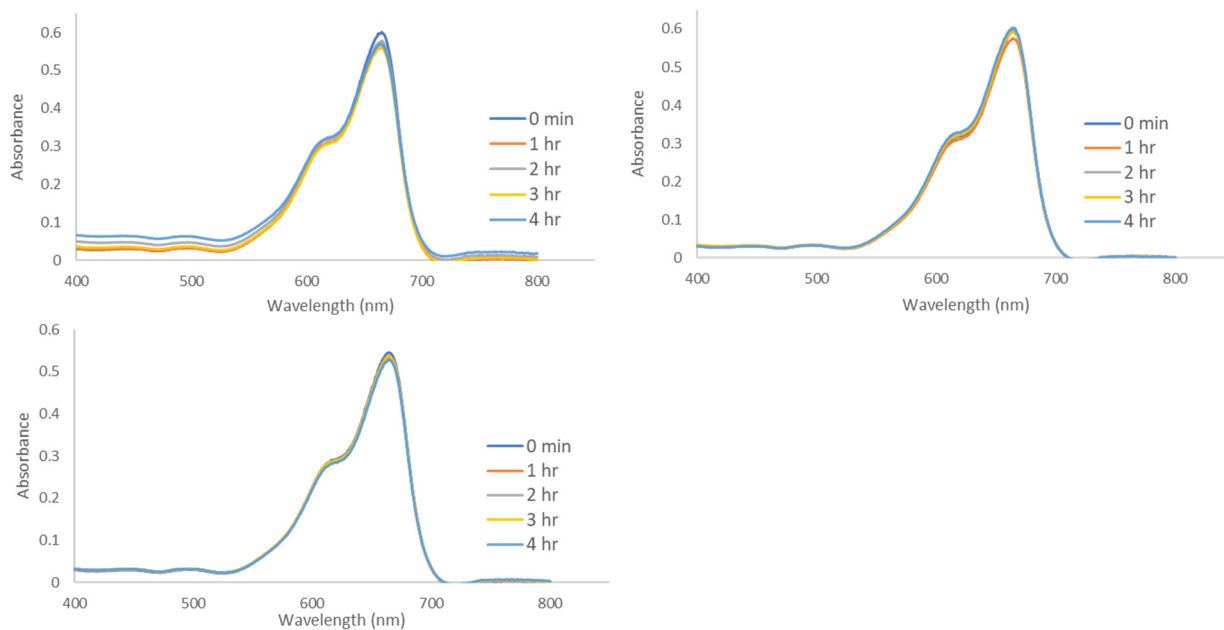**Figure S6.** Time dependent UV-Vis spectra of MB with ZnO nanostructures without UV light.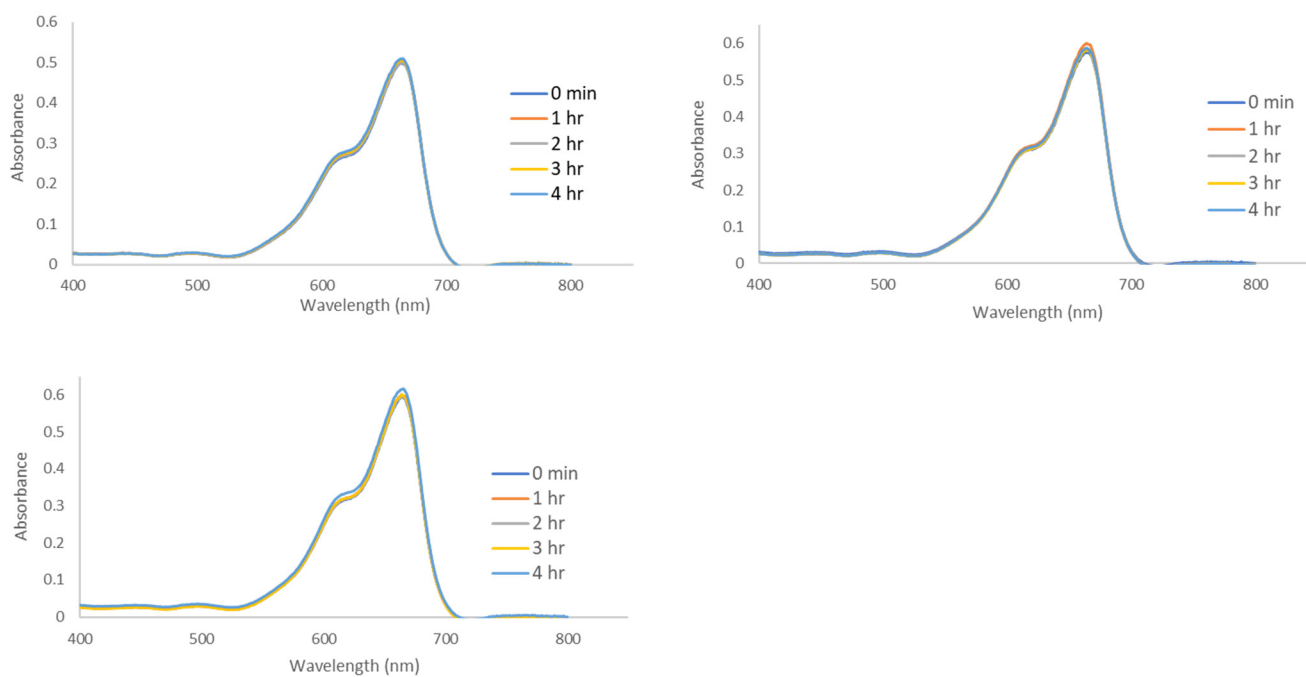**Figure S7.** Time dependent UV-Vis spectra of MB with UV light only.
